# Supplementary material for: Principles of chemical geometry underlying chiral selectivity in RNA minihelix aminoacylation
Source: PubMed Central journal article supplement (PMC6265448; doi:10.1093/nar/gky909), 2018-10-15
Supplement: gky909_supplemental_files.pdf [file gky909_supplemental_files.pdf]

Supplementary material to:

**Principles of chemical geometry underlying chiral selectivity in RNA minihelix aminoacylation**

Tadashi Ando<sup>1,2,\*</sup>, Shunichi Takahashi<sup>1</sup> and Koji Tamura<sup>2,3,\*</sup>

<sup>1</sup>Department of Applied Electronics, Tokyo University of Science,  
6-3-1 Nijjuku, Katsushika-ku, Tokyo 125-8585, Japan

<sup>2</sup>Research Institute for Science and Technology, Tokyo University of Science,  
2641 Yamazaki, Noda, Chiba 278-8510, Japan

<sup>3</sup>Department of Biological Science and Technology, Tokyo University of Science,  
6-3-1 Nijjuku, Katsushika-ku, Tokyo 125-8585, Japan

\*To whom correspondence may be addressed. Email: [tando@rs.tus.ac.jp](mailto:tando@rs.tus.ac.jp) or [koji@rs.tus.ac.jp](mailto:koji@rs.tus.ac.jp).

**Contents**

**Table S1**

**Table S2**

**Figure S1**

**Figure S2**

Table S1

**Table S1. Number of reactive conformations found in the trajectories of the L-Ala and D-Ala systems using various distances and angles for geometrical criteria with (Nu, R) = (O<sub>3</sub>, C<sub>3</sub>)**

| Conditions                                                                                                                                                                                                                                                                          | Number of conformations |       | Ratio (L-Ala/D-Ala) |
|-------------------------------------------------------------------------------------------------------------------------------------------------------------------------------------------------------------------------------------------------------------------------------------|-------------------------|-------|---------------------|
|                                                                                                                                                                                                                                                                                     | L-Ala                   | D-Ala |                     |
| $\delta^{\text{att}} < 3.2 \text{ \AA}$ , $ \alpha^{\text{BD}} - 105^\circ  < 15^\circ$ , $ \alpha^{\text{FL}}  < 25^\circ$ ,<br>$ \alpha^{\text{Lobe}} - 109.5^\circ  < 15^\circ$ , $\min(\delta_{\text{OP1}}^{\text{SAC}}, \delta_{\text{OP2}}^{\text{SAC}}) < 3.5 \text{ \AA}$   | 145                     | 48    | 3.0                 |
| $\delta^{\text{att}} < 3.2 \text{ \AA}$ , $ \alpha^{\text{BD}} - 105^\circ  < 15^\circ$ , $ \alpha^{\text{FL}}  < 15^\circ$ ,<br>$ \alpha^{\text{Lobe}} - 109.5^\circ  < 15^\circ$ , $\min(\delta_{\text{OP1}}^{\text{SAC}}, \delta_{\text{OP2}}^{\text{SAC}}) < 3.5 \text{ \AA}$   | 121                     | 35    | 3.5                 |
| $\delta^{\text{att}} < 3.0 \text{ \AA}$ , $ \alpha^{\text{BD}} - 105^\circ  < 15^\circ$ , $ \alpha^{\text{FL}}  < 25^\circ$ ,<br>$ \alpha^{\text{Lobe}} - 109.5^\circ  < 15^\circ$ , $\min(\delta_{\text{OP1}}^{\text{SAC}}, \delta_{\text{OP2}}^{\text{SAC}}) < 3.5 \text{ \AA}$   | 47                      | 9     | 5.2                 |
| $\delta^{\text{att}} < 3.5 \text{ \AA}$ , $ \alpha^{\text{BD}} - 105^\circ  < 15^\circ$ , $ \alpha^{\text{FL}}  < 25^\circ$ ,<br>$ \alpha^{\text{Lobe}} - 109.5^\circ  < 15^\circ$ , $\min(\delta_{\text{OP1}}^{\text{SAC}}, \delta_{\text{OP2}}^{\text{SAC}}) < 3.5 \text{ \AA}$   | 235                     | 88    | 2.7                 |
| $\delta^{\text{att}} < 3.2 \text{ \AA}$ , $ \alpha^{\text{BD}} - 105^\circ  < 25^\circ$ , $ \alpha^{\text{FL}}  < 25^\circ$ ,<br>$ \alpha^{\text{Lobe}} - 109.5^\circ  < 15^\circ$ , $\min(\delta_{\text{OP1}}^{\text{SAC}}, \delta_{\text{OP2}}^{\text{SAC}}) < 3.5 \text{ \AA}$   | 177                     | 84    | 2.1                 |
| $\delta^{\text{att}} < 3.2 \text{ \AA}$ , $ \alpha^{\text{BD}} - 105^\circ  < 15^\circ$ , $ \alpha^{\text{FL}}  < 25^\circ$ ,<br>$ \alpha^{\text{Lobe}} - 109.5^\circ  < 25^\circ$ , $\min(\delta_{\text{OP1}}^{\text{SAC}}, \delta_{\text{OP2}}^{\text{SAC}}) < 3.5 \text{ \AA}$   | 245                     | 169   | 1.4                 |
| $\delta^{\text{att}} < 3.2 \text{ \AA}$ , $ \alpha^{\text{BD}} - 105^\circ  < 25^\circ$ , $ \alpha^{\text{FL}}  < 25^\circ$ ,<br>$ \alpha^{\text{Lobe}} - 109.5^\circ  < 25^\circ$ , $\min(\delta_{\text{OP1}}^{\text{SAC}}, \delta_{\text{OP2}}^{\text{SAC}}) < 3.5 \text{ \AA}$   | 327                     | 306   | 1.1                 |
| $\delta^{\text{att}} < 3.2 \text{ \AA}$ , $ \alpha^{\text{BD}} - 105^\circ  < 15^\circ$ , $ \alpha^{\text{FL}}  < 25^\circ$ ,<br>$ \alpha^{\text{Lobe}} - 109.5^\circ  < 15^\circ$ , $\min(\delta_{\text{OP1}}^{\text{SAC}}, \delta_{\text{OP2}}^{\text{SAC}}) < 4.0 \text{ \AA}$   | 309                     | 135   | 2.3                 |
| $\delta^{\text{att}} < 3.2 \text{ \AA}$ , $ \alpha^{\text{BD}} - 105^\circ  < 180^\circ$ , $ \alpha^{\text{FL}}  < 180^\circ$ ,<br>$ \alpha^{\text{Lobe}} - 109.5^\circ  < 180^\circ$ , $\min(\delta_{\text{OP1}}^{\text{SAC}}, \delta_{\text{OP2}}^{\text{SAC}}) < 99 \text{ \AA}$ | 3653                    | 4289  | 0.9                 |
| $\delta^{\text{att}} < 3.2 \text{ \AA}$ , $ \alpha^{\text{BD}} - 105^\circ  < 15^\circ$ , $ \alpha^{\text{FL}}  < 180^\circ$ ,<br>$ \alpha^{\text{Lobe}} - 109.5^\circ  < 180^\circ$ , $\min(\delta_{\text{OP1}}^{\text{SAC}}, \delta_{\text{OP2}}^{\text{SAC}}) < 99 \text{ \AA}$  | 2144                    | 2157  | 1.0                 |
| $\delta^{\text{att}} < 3.2 \text{ \AA}$ , $ \alpha^{\text{BD}} - 105^\circ  < 15^\circ$ , $ \alpha^{\text{FL}}  < 25^\circ$ ,<br>$ \alpha^{\text{Lobe}} - 109.5^\circ  < 180^\circ$ , $\min(\delta_{\text{OP1}}^{\text{SAC}}, \delta_{\text{OP2}}^{\text{SAC}}) < 99 \text{ \AA}$   | 2023                    | 2009  | 1.0                 |
| $\delta^{\text{att}} < 3.2 \text{ \AA}$ , $ \alpha^{\text{BD}} - 105^\circ  < 15^\circ$ , $ \alpha^{\text{FL}}  < 180^\circ$ ,<br>$ \alpha^{\text{Lobe}} - 109.5^\circ  < 15^\circ$ , $\min(\delta_{\text{OP1}}^{\text{SAC}}, \delta_{\text{OP2}}^{\text{SAC}}) < 99 \text{ \AA}$   | 723                     | 564   | 1.3                 |
| $\delta^{\text{att}} < 3.2 \text{ \AA}$ , $ \alpha^{\text{BD}} - 105^\circ  < 15^\circ$ , $ \alpha^{\text{FL}}  < 180^\circ$ ,<br>$ \alpha^{\text{Lobe}} - 109.5^\circ  < 15^\circ$ , $\min(\delta_{\text{OP1}}^{\text{SAC}}, \delta_{\text{OP2}}^{\text{SAC}}) < 3.5 \text{ \AA}$  | 149                     | 49    | 3.0                 |

Table S2

**Table S2. Number of reactive conformations in eight groups classified by dihedral angles of alanyl phosphate**

| Dihedral angles (°)                                          |                                                                       |                                                                         | Number of conformations* |           | Group ID |
|--------------------------------------------------------------|-----------------------------------------------------------------------|-------------------------------------------------------------------------|--------------------------|-----------|----------|
| $\tau(\text{C}_{5'}-\text{O}_{5'}-\text{P}_{5'}-\text{O}_b)$ | $\tau(\text{O}_{5'}-\text{P}_{5'}-\text{O}_b-\text{C}_{\text{carb}})$ | $\tau(\text{P}_{5'}-\text{O}_b-\text{C}_{\text{carb}}-\text{C}_\alpha)$ | L-Ala                    | D-Ala     |          |
| $\geq 120$                                                   | $\geq 120$                                                            | $\geq 120$                                                              | 118 (0.81)               | 8 (0.17)  | I        |
|                                                              |                                                                       | $\leq 60$                                                               | 3 (0.02)                 | 18 (0.38) | II       |
|                                                              | $< 120$                                                               | $\geq 120$                                                              | 12 (0.08)                | 4 (0.08)  | III      |
|                                                              |                                                                       | $\leq 60$                                                               | 0 (0)                    | 0 (0)     |          |
| $< 120$                                                      | $\geq 120$                                                            | $\geq 120$                                                              | 12 (0.08)                | 10 (0.21) | IV       |
|                                                              |                                                                       | $\leq 60$                                                               | 0 (0)                    | 7 (0.15)  | V        |
|                                                              | $< 120$                                                               | $\geq 120$                                                              | 0 (0)                    | 1 (0.02)  | VI       |
|                                                              |                                                                       | $\leq 60$                                                               | 0 (0)                    | 0 (0)     |          |

\*Fractions of groups are shown in parenthesis.

Figure S1

| Group ID | L-Ala                                                                               | D-Ala                                                                                |
|----------|-------------------------------------------------------------------------------------|--------------------------------------------------------------------------------------|
| I        | 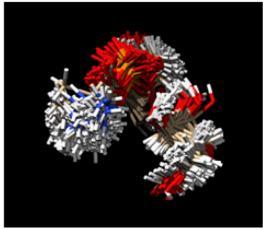   |    |
| II       |    |    |
| III      |   |   |
| IV       |  |  |
| V        | -                                                                                   |  |
| VI       | -                                                                                   |  |

**Figure S1.** Structures of members in eight groups listed in Table S2. Structures in group IV for L-Ala were not well clustered due to heterogeneity in  $\tau(C_4-C_5-O_5-P_5)$  and  $\tau(O_b-C_{carb}-C_\alpha-N)$ .

Figure S2

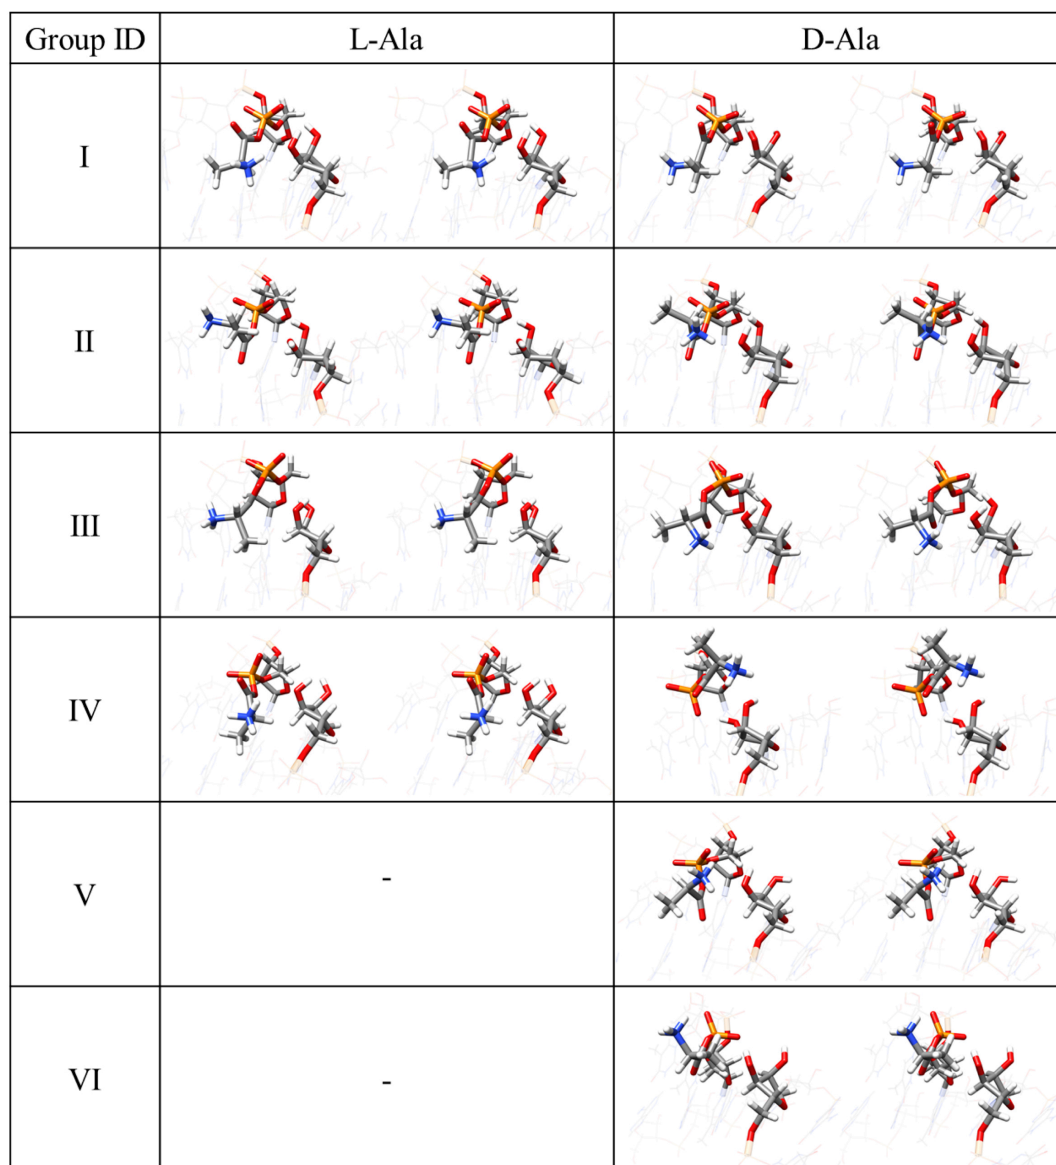

**Figure S2.** Representative structures of eight groups listed in Table S2. The structures are shown as a cross-eyed stereo view.
